# Supplementary material
Source: Springer Nature journal article supplement (https://www.springermedizin.de/resource/supplementary/12936_2011_1918_MOESM6_ESM.pdf/9541982)

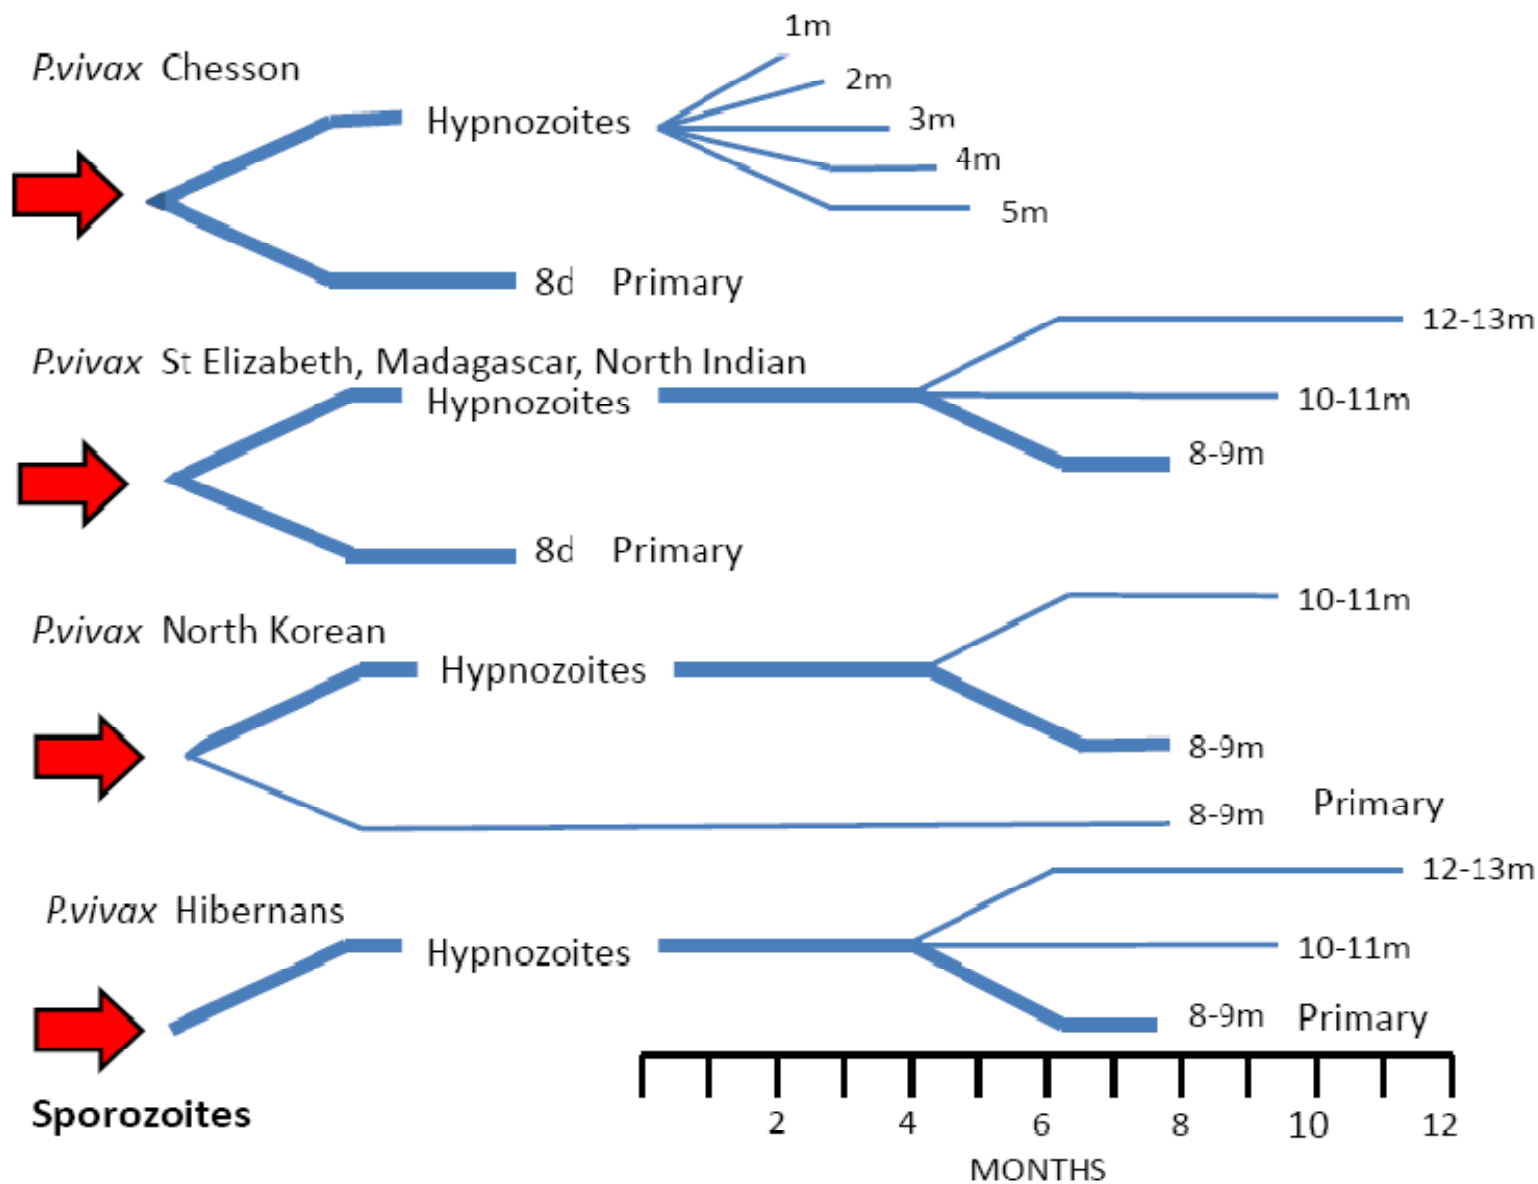

Supplement: MOESM6 [file 9541982]
